# Supplementary material
Source: publisher figshare collection journal article supplement (https://tandf.figshare.com/ndownloader/files/13085108)
Supplement: Supplementary file 1 [file 13085108]

# Coordination in a Supply Chain with Two Manufacturers, Two Substitute Products, and One Retailer

Anders Thorstenson

Department of Economics and Business Economics

Aarhus University, Aarhus, 8210 Denmark.

Email-address: anders.thorstenson@econ.au.dk

Ph:+4587164897.

Vinay Ramani\*

Department of Economics

Indian Institute of Management, Udaipur, 313001 India.

Email-address: vinay.ramani@iimu.ac.in

Ph: +912942477126.

---

\*Corresponding Author
